# Supplementary material for: A QM/MM Evaluation of the Missing Step in the Reduction Mechanism of HMG-CoA by Human HMG-CoA Reductase
Source: MDPI journal article supplement (doi:10.3390/pr9071085), 2021-06-23
Supplement: s1 [file s1]

## Supplementary data

### A QM/MM Evaluation of the Missing Step in the Reduction Mechanism of HMG-CoA by Human HMG-CoA Reductase

Paula Mihaljević-Jurić<sup>1,2</sup> Sérgio F. Sousa<sup>3\*</sup>

<sup>1</sup> Structural Biology of the Cell Laboratory UMR 7654 CNRS, École Polytechnique, 91128 Palaiseau, France; [paula.m.juric@gmail.com](mailto:paula.m.juric@gmail.com)

<sup>2</sup> Department of Chemistry, University of Osijek, Ulica cara Hadrijana 8/A, 31000 Osijek, Croatia

<sup>3</sup> UCIBIO@REQUIMTE, BioSIM—Department of Biochemistry, Faculty of Medicine, University of Porto, Alameda Professor Hernani Monteiro, 4200-319 Porto, Portugal

\* Correspondence: [sergiofsousa@med.up.pt](mailto:sergiofsousa@med.up.pt)

In this paper we have used NADPH parameters developed and published in [1].

| The neutral His405 System |                        |                 |                       |
|---------------------------|------------------------|-----------------|-----------------------|
| Atoms                     | q <sub>Reactants</sub> | q <sub>TS</sub> | q <sub>Products</sub> |
| HIS405-N                  | -0.1752                | -0.1630         | -0.1663               |
| GLU98-O1                  | -0.5029                | -0.5092         | -0.6065               |
| GLU98-O2                  | -0.1589                | -0.1550         | -0.6297               |
| GLU98-C                   | 0.5631                 | 0.5791          | 0.5765                |
| MEV815-O                  | -0.4814                | -0.6135         | -0.2935               |
| MEV815-C                  | 0.4652                 | 0.3207          | 0.2181                |
| NADPH818-C                | -0.0904                | -0.1107         | 0.0571                |

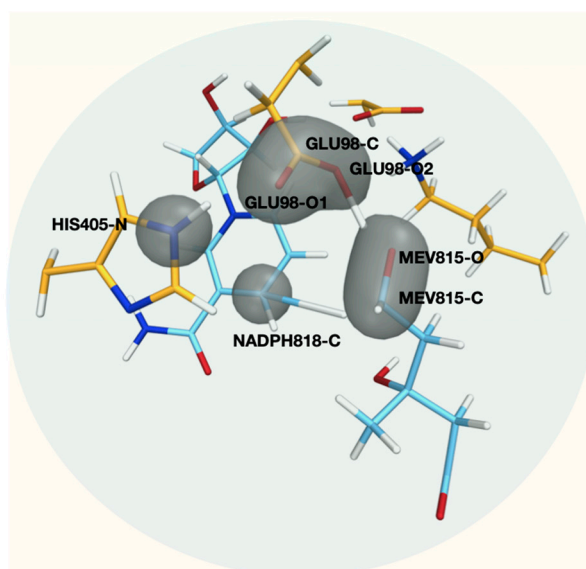

**Figure S1** The mulliken charges for each atom involved in the reaction mechanism for *The Neutral His405 System* (left) with a corresponding optimized structure of the products (right).

| The cationic His405 System |                        |                 |                       |
|----------------------------|------------------------|-----------------|-----------------------|
| Atoms                      | q <sub>Reactants</sub> | q <sub>TS</sub> | q <sub>Products</sub> |
| HIS405-N                   | -0.5456                | -0.5437         | -0.4971               |
| GLU98-O1                   | -0.5472                | -0.5703         | -0.6409               |
| GLU98-O2                   | -0.5711                | -0.5831         | -0.5260               |
| GLU98-C                    | 0.6033                 | 0.6031          | 0.6031                |
| MEV815-O                   | -0.4687                | -0.5967         | -0.7357               |
| MEV815-C                   | 0.3008                 | 0.1095          | -0.0225               |
| NADPH818-C                 | -0.3199                | -0.2985         | -0.1005               |

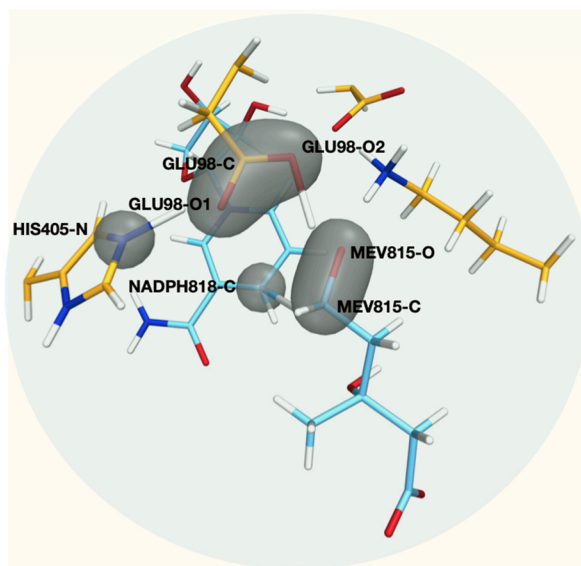

**Figure S2** The mulliken charges for each atom involved in the reaction mechanism for *The Cationic His405 System* (left) with a corresponding optimized structure of the products (right).

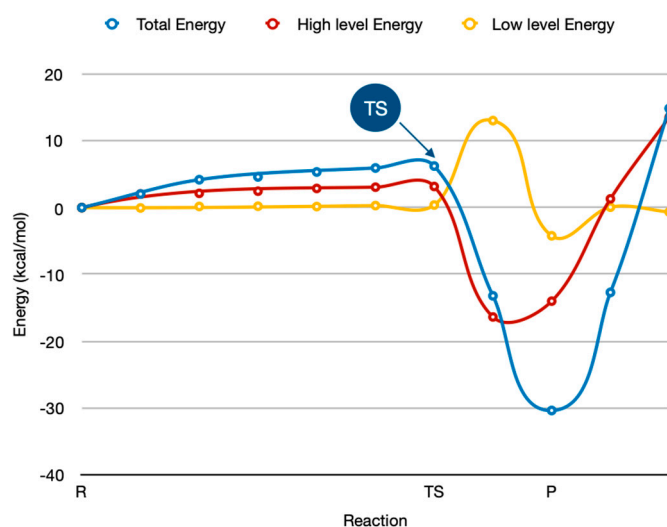

**Figure S3** The linear scan of *The Natural His405 System*. The distance was decreased from 2.99 to 2.19 Å with a 0.5 Å increment, after which another linear scan was done with a decrease of the distance with the increments of 0.01 Å.

#### References:

[1] Cummins PL, Ramnarayan K, Singh UC, Gready JE, Molecular-dynamics free-energy perturbation study on the relative affinities of the binding of reduced and oxidized NADP to dihydrofolate-reductase, *Journal of the American Chemical Society* 1991, 113, 8247.
